# Supplementary material for: Functional Polymorphisms in DNA Repair Genes Are Associated with Sporadic Colorectal Cancer Susceptibility and Clinical Outcome
Source: PubMed Central journal article supplement (PMC6337670; doi:10.3390/ijms20010097), 2018-12-27
Supplement: ijms-20-00097-s001.pdf [file ijms-20-00097-s001.pdf]

|                   |              |           |     |      |           |             |     |     |      |           |             |     |     |      |           |      |      |     |      |           |              |     |     |      |           |              |     |     |      |           |             |
|-------------------|--------------|-----------|-----|------|-----------|-------------|-----|-----|------|-----------|-------------|-----|-----|------|-----------|------|------|-----|------|-----------|--------------|-----|-----|------|-----------|--------------|-----|-----|------|-----------|-------------|
|                   | <i>CT+TT</i> | 1256      | 310 | 1.04 | 0.85-1.27 | 0.71        | 831 | 211 | 1.02 | 0.80-1.31 | 0.86        | 412 | 94  | 1.02 | 0.72-1.46 | 0.90 | 1256 | 462 | 1.14 | 0.96-1.36 | 0.12         | 831 | 300 | 1.04 | 0.85-1.29 | 0.70         | 412 | 156 | 1.35 | 1.00-1.81 | <b>0.05</b> |
|                   | <i>CC+CT</i> | 1415      | 353 | Ref  |           |             | 920 | 241 | Ref  |           |             | 483 | 109 | Ref  |           |      | 1415 | 512 | Ref  |           |              | 920 | 334 | Ref  |           |              | 483 | 174 | Ref  |           |             |
|                   | <i>TT</i>    | 384       | 91  | 1.01 | 0.80-1.27 | 0.96        | 252 | 59  | 0.93 | 0.70-1.24 | 0.63        | 126 | 30  | 1.16 | 0.78-1.74 | 0.47 | 384  | 133 | 0.99 | 0.82-1.20 | 0.93         | 252 | 88  | 1.00 | 0.79-1.26 | 0.97         | 126 | 42  | 0.96 | 0.69-1.35 | 0.83        |
| <b>Austria</b>    |              |           |     |      |           |             |     |     |      |           |             |     |     |      |           |      |      |     |      |           |              |     |     |      |           |              |     |     |      |           |             |
| <b>rs12450550</b> | <i>EME1</i>  | <i>TT</i> | 564 | 119  | Ref       |             | 348 | 75  | Ref  |           |             | 206 | 42  | Ref  |           |      | 564  | 164 | Ref  |           |              | 348 | 99  | Ref  |           |              | 206 | 63  | Ref  |           |             |
|                   | <i>TC</i>    | 325       | 66  | 0.95 | 0.70-1.28 | 0.72        | 196 | 43  | 0.99 | 0.68-1.44 | 0.97        | 123 | 23  | 0.92 | 0.55-1.53 | 0.75 | 325  | 86  | 0.88 | 0.68-1.14 | 0.34         | 196 | 54  | 0.92 | 0.66-1.28 | 0.61         | 123 | 32  | 0.86 | 0.56-1.31 | 0.47        |
|                   | <i>CC</i>    | 61        | 6   | 0.43 | 0.19-0.97 | <b>0.04</b> | 38  | 3   | 0.32 | 0.10-1.02 | <b>0.05</b> | 20  | 3   | 0.76 | 0.23-2.44 | 0.64 | 61   | 9   | 0.47 | 0.24-0.91 | <b>0.03</b>  | 38  | 6   | 0.49 | 0.22-1.12 | 0.09         | 20  | 3   | 0.49 | 0.15-1.56 | 0.23        |
|                   | <i>TC+CC</i> | 386       | 72  | 0.86 | 0.64-1.15 | 0.31        | 234 | 46  | 0.87 | 0.61-1.26 | 0.47        | 143 | 26  | 0.90 | 0.55-1.47 | 0.67 | 386  | 95  | 0.81 | 0.63-1.05 | 0.10         | 234 | 60  | 0.85 | 0.61-1.16 | 0.30         | 143 | 35  | 0.81 | 0.53-1.22 | 0.30        |
|                   | <i>TT+TC</i> | 889       | 185 | Ref  |           |             | 544 | 118 | Ref  |           |             | 329 | 65  | Ref  |           |      | 889  | 250 | Ref  |           |              | 544 | 153 | Ref  |           |              | 329 | 95  | Ref  |           |             |
|                   | <i>CC</i>    | 61        | 6   | 0.44 | 0.19-0.99 | <b>0.05</b> | 38  | 3   | 0.32 | 0.10-1.02 | <b>0.05</b> | 20  | 3   | 0.78 | 0.24-2.47 | 0.67 | 61   | 9   | 0.49 | 0.25-0.95 | <b>0.03</b>  | 38  | 6   | 0.51 | 0.22-1.14 | 0.10         | 20  | 3   | 0.52 | 0.17-1.64 | 0.26        |
| <b>rs2283432</b>  | <i>FANCI</i> | <i>CC</i> | 333 | 74   | Ref       |             | 211 | 48  | Ref  |           |             | 118 | 26  | Ref  |           |      | 333  | 106 | Ref  |           |              | 211 | 66  | Ref  |           |              | 118 | 40  | Ref  |           |             |
|                   | <i>CG</i>    | 462       | 87  | 0.83 | 0.61-1.13 | 0.23        | 284 | 57  | 0.86 | 0.59-1.26 | 0.44        | 165 | 28  | 0.75 | 0.44-1.29 | 0.30 | 462  | 115 | 0.74 | 0.57-0.96 | <b>0.02*</b> | 284 | 73  | 0.78 | 0.56-1.09 | 0.14         | 165 | 40  | 0.66 | 0.43-1.03 | 0.07        |
|                   | <i>GG</i>    | 155       | 30  | 0.86 | 0.57-1.32 | 0.50        | 87  | 16  | 0.81 | 0.46-1.42 | 0.45        | 66  | 14  | 0.96 | 0.50-1.84 | 0.90 | 155  | 38  | 0.75 | 0.51-1.08 | 0.12         | 87  | 20  | 0.71 | 0.43-1.17 | 0.18         | 66  | 18  | 0.78 | 0.45-1.37 | 0.39        |
|                   | <i>CG+GG</i> | 617       | 117 | 0.84 | 0.63-1.12 | 0.23        | 371 | 73  | 0.85 | 0.59-1.22 | 0.37        | 231 | 42  | 0.81 | 0.50-1.32 | 0.40 | 617  | 153 | 0.74 | 0.58-0.95 | <b>0.02</b>  | 371 | 93  | 0.76 | 0.56-1.05 | 0.09         | 231 | 58  | 0.70 | 0.47-1.04 | 0.08        |
|                   | <i>CC+CG</i> | 795       | 161 | Ref  |           |             | 495 | 105 | Ref  |           |             | 283 | 54  | Ref  |           |      | 795  | 221 | Ref  |           |              | 495 | 139 | Ref  |           |              | 283 | 80  | Ref  |           |             |
|                   | <i>GG</i>    | 155       | 30  | 0.96 | 0.65-1.42 | 0.85        | 87  | 16  | 0.88 | 0.52-1.49 | 0.63        | 66  | 14  | 1.13 | 0.63-2.03 | 0.69 | 155  | 38  | 0.88 | 0.63-1.25 | 0.48         | 87  | 20  | 0.82 | 0.51-1.31 | 0.41         | 66  | 18  | 0.98 | 0.59-1.63 | 0.93        |
| <b>rs3087386</b>  | <i>REV1</i>  | <i>CC</i> | 301 | 50   | Ref       |             | 191 | 30  | Ref  |           |             | 102 | 20  | Ref  |           |      | 301  | 71  | Ref  |           |              | 191 | 42  | Ref  |           |              | 102 | 29  | Ref  |           |             |
|                   | <i>CT</i>    | 481       | 106 | 1.38 | 0.99-1.93 | 0.06        | 298 | 67  | 1.55 | 1.01-2.39 | <b>0.05</b> | 175 | 38  | 1.06 | 0.61-1.81 | 0.85 | 481  | 139 | 1.28 | 0.97-1.71 | 0.09         | 298 | 85  | 1.40 | 0.97-2.03 | 0.07         | 175 | 53  | 1.04 | 0.66-1.64 | 0.86        |
|                   | <i>TT</i>    | 168       | 35  | 1.31 | 0.85-2.02 | 0.22        | 93  | 24  | 1.81 | 1.06-3.10 | <b>0.03</b> | 72  | 10  | 0.67 | 0.32-1.44 | 0.31 | 168  | 49  | 1.30 | 0.90-1.87 | 0.16         | 93  | 32  | 1.73 | 1.09-2.74 | <b>0.02</b>  | 72  | 16  | 0.74 | 0.40-1.36 | 0.33        |
|                   | <i>CT+TT</i> | 649       | 141 | 1.36 | 0.99-1.88 | 0.06        | 391 | 91  | 1.61 | 1.07-2.43 | <b>0.02</b> | 247 | 48  | 0.94 | 0.56-1.59 | 0.83 | 649  | 188 | 1.29 | 0.98-1.69 | 0.07         | 391 | 117 | 1.48 | 1.04-2.10 | <b>0.03*</b> | 247 | 69  | 0.95 | 0.62-1.47 | 0.82        |
|                   | <i>CC+CT</i> | 782       | 156 | Ref  |           |             | 489 | 97  | Ref  |           |             | 277 | 58  | Ref  |           |      | 782  | 210 | Ref  |           |              | 489 | 127 | Ref  |           |              | 277 | 82  | Ref  |           |             |
|                   | <i>TT</i>    | 168       | 35  | 1.07 | 0.74-1.54 | 0.73        | 93  | 24  | 1.37 | 0.87-2.13 | 0.17        | 72  | 10  | 0.65 | 0.33-1.27 | 0.21 | 168  | 49  | 1.11 | 0.81-1.51 | 0.52         | 93  | 32  | 1.40 | 0.95-2.06 | 0.09         | 72  | 16  | 0.72 | 0.42-1.24 | 0.24        |
| <b>rs3204953</b>  | <i>REV3L</i> | <i>AA</i> | 699 | 152  | Ref       |             | 424 | 96  | Ref  |           |             | 260 | 55  | Ref  |           |      | 699  | 205 | Ref  |           |              | 424 | 128 | Ref  |           |              | 260 | 76  | Ref  |           |             |
|                   | <i>AG</i>    | 226       | 33  | 0.70 | 0.48-1.02 | 0.06        | 145 | 22  | 0.68 | 0.43-1.08 | 0.10        | 77  | 10  | 0.66 | 0.34-1.30 | 0.23 | 226  | 46  | 0.70 | 0.51-0.97 | <b>0.03*</b> | 145 | 28  | 0.62 | 0.41-0.94 | <b>0.02</b>  | 77  | 17  | 0.81 | 0.48-1.37 | 0.43        |
|                   | <i>GG</i>    | 25        | 6   | 1.16 | 0.51-2.63 | 0.72        | 13  | 3   | 1.15 | 0.36-3.61 | 0.82        | 12  | 3   | 1.17 | 0.37-3.73 | 0.79 | 25   | 8   | 1.18 | 0.58-2.39 | 0.65         | 13  | 3   | 0.81 | 0.26-2.54 | 0.72         | 12  | 5   | 1.59 | 0.65-3.94 | 0.31        |
|                   | <i>AG+GG</i> | 251       | 39  | 0.75 | 0.52-1.06 | 0.10        | 158 | 25  | 0.72 | 0.46-1.11 | 0.14        | 89  | 13  | 0.74 | 0.40-1.35 | 0.32 | 251  | 54  | 0.75 | 0.55-1.01 | 0.06         | 158 | 31  | 0.64 | 0.43-0.94 | <b>0.02*</b> | 89  | 22  | 0.91 | 0.57-1.47 | 0.70        |
|                   | <i>AA+AG</i> | 925       | 185 | Ref  |           |             | 569 | 118 | Ref  |           |             | 337 | 65  | Ref  |           |      | 925  | 251 | Ref  |           |              | 569 | 156 | Ref  |           |              | 337 | 93  | Ref  |           |             |
|                   | <i>GG</i>    | 25        | 6   | 1.25 | 0.56-2.83 | 0.59        | 13  | 3   | 1.25 | 0.40-3.94 | 0.70        | 12  | 3   | 1.26 | 0.40-4.01 | 0.70 | 25   | 8   | 1.27 | 0.63-2.57 | 0.50         | 13  | 3   | 0.90 | 0.29-2.82 | 0.85         | 12  | 5   | 1.67 | 0.68-4.10 | 0.27        |

CRC, colorectal cancer; HR, hazard ratio; CI, confidence interval.

Significant results in bold. Results that passed the Benjamini-Hochberg FDR test for multiple comparisons are marked with an asterisk.

<sup>a</sup> Numbers may not add up to 100% of available subjects because of genotyping failure. All samples that did not give a reliable result in the first round of genotyping were resubmitted to up to two additional rounds of genotyping. Data points that were still not filled after this procedure had been left blank.



**Supplementary Table S3: SNPs associated with OS and EFS of patients receiving 5-FU-based chemotherapy without oxaliplatin in the pooled population and in groups stratified for tumor sites (Cox regression for adjusted estimates).**

| Gene<br>SNP                | Genotype | Overall survival |        |           |           |         |                       |        |            |            |         |                        |        |            |            |             | Event free survival |        |           |           |         |                       |        |            |             |             |                        |        |            |               |               |
|----------------------------|----------|------------------|--------|-----------|-----------|---------|-----------------------|--------|------------|------------|---------|------------------------|--------|------------|------------|-------------|---------------------|--------|-----------|-----------|---------|-----------------------|--------|------------|-------------|-------------|------------------------|--------|------------|---------------|---------------|
|                            |          | All CRC patients |        |           |           |         | Colon cancer patients |        |            |            |         | Rectal cancer patients |        |            |            |             | All CRC patients    |        |           |           |         | Colon cancer patients |        |            |             |             | Rectal cancer patients |        |            |               |               |
|                            |          | N <sup>a</sup>   | Events | HR        | 95% CI    | P-Value | N <sup>a</sup>        | Events | HR         | 95% CI     | P-Value | N <sup>a</sup>         | Events | HR         | 95% CI     | P-Value     | N <sup>a</sup>      | Events | HR        | 95% CI    | P-Value | N <sup>a</sup>        | Events | HR         | 95% CI      | P-Value     | N <sup>a</sup>         | Events | HR         | 95% CI        | P-Value       |
| <b>Czech Republic</b>      |          |                  |        |           |           |         |                       |        |            |            |         |                        |        |            |            |             |                     |        |           |           |         |                       |        |            |             |             |                        |        |            |               |               |
| <b>FAAP24</b><br>rs3816032 | TT       | 342              | 60     | Ref       |           |         | 220                   | 39     | Ref        |            |         | 120                    | 20     | Ref        |            |             | 342                 | 110    | Ref       |           |         | 220                   | 70     | Ref        |             |             | 120                    | 38     | Ref        |               |               |
|                            | TC       | 126              | 27     | 1.21      | 0.77-1.90 | 0.42    | 93                    | 19     | 1.10       | 0.64-1.91  | 0.73    | 33                     | 8      | 1.48       | 0.65-3.36  | 0.35        | 126                 | 37     | 0.89      | 0.62-1.30 | 0.55    | 93                    | 25     | 0.79       | 0.50-1.25   | 0.32        | 33                     | 12     | 1.18       | 0.61-2.25     | 0.63          |
|                            | CC       | 12               | 5      | 2.14      | 0.86-5.35 | 0.10    | 10                    | 4      | 1.70       | 0.61-4.77  | 0.31    | 2                      | 1      | 11.07      | 1.35-90.62 | <b>0.03</b> | 12                  | 6      | 1.27      | 0.56-2.90 | 0.56    | 10                    | 4      | 0.85       | 0.31-2.34   | 0.76        | 2                      | 2      | 7.43       | 1.73-32.02    | <b>0.007*</b> |
|                            | TC+CC    | 138              | 32     | 1.29      | 0.84-1.98 | 0.24    | 103                   | 23     | 1.17       | 0.70-1.97  | 0.54    | 35                     | 9      | 1.63       | 0.74-3.58  | 0.23        | 138                 | 43     | 0.93      | 0.66-1.33 | 0.69    | 103                   | 29     | 0.80       | 0.52-1.24   | 0.32        | 35                     | 14     | 1.34       | 0.72-2.47     | 0.36          |
|                            | TT+TC    | 468              | 87     | Ref       |           |         | 313                   | 58     | Ref        |            |         | 153                    | 28     | Ref        |            |             | 468                 | 147    | Ref       |           |         | 313                   | 95     | Ref        |             |             | 153                    | 50     | Ref        |               |               |
| CC                         | 12       | 5                | 1.97   | 0.80-4.85 | 0.14      | 10      | 4                     | 1.61   | 0.58-4.45  | 0.36       | 2       | 1                      | 6.43   | 0.84-49.18 | 0.07       | 12          | 6                   | 1.32   | 0.58-2.99 | 0.50      | 10      | 4                     | 0.94   | 0.34-2.55  | 0.90        | 2           | 2                      | 7.27   | 1.72-30.69 | <b>0.007*</b> |               |
| <b>RAD51D</b><br>rs4796033 | CC       | 342              | 66     | Ref       |           |         | 225                   | 45     | Ref        |            |         | 116                    | 21     | Ref        |            |             | 342                 | 111    | Ref       |           |         | 225                   | 70     | Ref        |             |             | 116                    | 40     | Ref        |               |               |
|                            | CT       | 129              | 24     | 1.04      | 0.65-1.66 | 0.88    | 91                    | 17     | 1.07       | 0.61-1.87  | 0.81    | 37                     | 6      | 0.82       | 0.33-2.03  | 0.66        | 129                 | 35     | 0.85      | 0.58-1.24 | 0.40    | 91                    | 25     | 0.98       | 0.62-1.55   | 0.93        | 37                     | 9      | 0.59       | 0.29-1.21     | 0.15          |
|                            | TT       | 18               | 3      | 0.79      | 0.25-2.53 | 0.70    | 13                    | 1      | 0.33       | 0.05-2.36  | 0.27    | 5                      | 2      | 2.66       | 0.62-11.38 | 0.19        | 18                  | 9      | 1.49      | 0.75-2.93 | 0.25    | 13                    | 5      | 1.02       | 0.41-2.52   | 0.97        | 5                      | 4      | 3.98       | 1.40-11.33    | <b>0.01*</b>  |
|                            | CT+TT    | 147              | 27     | 1.00      | 0.64-1.57 | 0.99    | 104                   | 18     | 0.95       | 0.55-1.64  | 0.85    | 42                     | 8      | 0.99       | 0.44-2.25  | 0.99        | 147                 | 44     | 0.93      | 0.66-1.32 | 0.68    | 104                   | 30     | 0.98       | 0.64-1.51   | 0.94        | 42                     | 13     | 0.80       | 0.43-1.49     | 0.48          |
|                            | CC+CT    | 471              | 90     | Ref       |           |         | 316                   | 62     | Ref        |            |         | 153                    | 27     | Ref        |            |             | 471                 | 146    | Ref       |           |         | 316                   | 95     | Ref        |             |             | 153                    | 49     | Ref        |               |               |
| TT                         | 18       | 3                | 0.78   | 0.25-2.47 | 0.67      | 13      | 1                     | 0.32   | 0.04-2.28  | 0.25       | 5       | 2                      | 2.74   | 0.65-11.55 | 0.17       | 18          | 9                   | 1.54   | 0.78-3.01 | 0.21      | 13      | 5                     | 1.01   | 0.41-2.49  | 0.98        | 5           | 4                      | 4.53   | 1.61-12.78 | <b>0.004*</b> |               |
| <b>REVI</b><br>rs3087399   | AA       | 334              | 65     | Ref       |           |         | 227                   | 43     | Ref        |            |         | 105                    | 21     | Ref        |            |             | 334                 | 111    | Ref       |           |         | 227                   | 70     | Ref        |             |             | 105                    | 39     | Ref        |               |               |
|                            | AG       | 142              | 27     | 1.02      | 0.65-1.59 | 0.95    | 95                    | 20     | 1.12       | 0.66-1.90  | 0.68    | 47                     | 7      | 0.84       | 0.36-1.97  | 0.68        | 142                 | 42     | 0.89      | 0.62-1.27 | 0.52    | 95                    | 29     | 0.96       | 0.62-1.48   | 0.86        | 47                     | 13     | 0.80       | 0.43-1.49     | 0.48          |
|                            | GG       | 6                | 2      | 2.16      | 0.53-8.82 | 0.28    | 3                     | 1      | 2.44       | 0.34-17.77 | 0.38    | 3                      | 1      | 2.14       | 0.29-16.00 | 0.46        | 6                   | 3      | 1.76      | 0.56-5.55 | 0.33    | 3                     | 2      | 4.10       | 1.00-16.91  | <b>0.05</b> | 3                      | 1      | 0.87       | 0.12-6.34     | 0.89          |
|                            | AG+GG    | 148              | 29     | 1.06      | 0.68-1.63 | 0.81    | 98                    | 21     | 1.15       | 0.68-1.94  | 0.60    | 50                     | 8      | 0.91       | 0.40-2.04  | 0.81        | 148                 | 45     | 0.92      | 0.65-1.30 | 0.64    | 98                    | 31     | 1.01       | 0.66-1.54   | 0.96        | 50                     | 14     | 0.80       | 0.43-1.47     | 0.47          |
|                            | AA+AG    | 476              | 92     | Ref       |           |         | 322                   | 63     | Ref        |            |         | 152                    | 28     | Ref        |            |             | 476                 | 153    | Ref       |           |         | 322                   | 99     | Ref        |             |             | 152                    | 52     | Ref        |               |               |
| GG                         | 6        | 2                | 2.16   | 0.53-8.79 | 0.28      | 3       | 1                     | 2.44   | 0.34-17.58 | 0.38       | 3       | 1                      | 2.21   | 0.30-16.31 | 0.44       | 6           | 3                   | 1.83   | 0.58-5.74 | 0.30      | 3       | 2                     | 4.00   | 0.98-16.33 | <b>0.05</b> | 3           | 1                      | 0.93   | 0.13-6.70  | 0.94          |               |
| <b>Austria</b>             |          |                  |        |           |           |         |                       |        |            |            |         |                        |        |            |            |             |                     |        |           |           |         |                       |        |            |             |             |                        |        |            |               |               |
| <b>POLN</b><br>rs9328764   | AA       | 3                | 1      | Ref       |           |         | 1                     | 1      | Ref        |            |         | 2                      | 0      | Ref        |            |             | 3                   | 1      | Ref       |           |         | 1                     | 1      | Ref        |             |             | 2                      | 0      | Ref        |               |               |
|                            | AG       | 76               | 8      | 0.36      | 0.05-2.89 | 0.34    | 35                    | 4      | 0.14       | 0.02-1.24  | 0.08    | 40                     | 4      | NA         |            |             | 76                  | 17     | 0.61      | 0.08-4.58 | 0.63    | 35                    | 7      | 0.03       | 0.002-0.52  | <b>0.02</b> | 40                     | 10     | NA         |               |               |
|                            | GG       | 168              | 27     | 0.58      | 0.08-4.23 | 0.59    | 94                    | 14     | 0.18       | 0.02-1.36  | 0.10    | 70                     | 13     | NA         |            |             | 168                 | 37     | 0.61      | 0.08-4.48 | 0.63    | 94                    | 19     | 0.08       | 0.01-0.64   | <b>0.02</b> | 70                     | 18     | NA         |               |               |
|                            | AG+GG    | 244              | 35     | 0.51      | 0.07-3.69 | 0.50    | 129                   | 18     | 0.17       | 0.02-1.25  | 0.08    | 110                    | 17     | NA         |            |             | 244                 | 54     | 0.61      | 0.09-4.42 | 0.63    | 129                   | 26     | 0.06       | 0.01-0.52   | <b>0.01</b> | 110                    | 28     | NA         |               |               |
|                            | AA+AG    | 79               | 9      | Ref       |           |         | 36                    | 5      | Ref        |            |         | 42                     | 4      | Ref        |            |             | 79                  | 18     | Ref       |           |         | 36                    | 8      | Ref        |             |             | 42                     | 10     | Ref        |               |               |
| GG                         | 168      | 27               | 1.46   | 0.69-3.11 | 0.32      | 94      | 14                    | 1.14   | 0.41-3.17  | 0.80       | 70      | 13                     | 1.95   | 0.64-5.99  | 0.24       | 168         | 37                  | 0.95   | 0.54-1.67 | 0.86      | 94      | 19                    | 0.90   | 0.39-2.05  | 0.80        | 70          | 18                     | 1.05   | 0.49-2.28  | 0.90          |               |

CRC, colorectal cancer; HR, hazard ratio; CI, confidence interval.

Significant results in bold. Results that passed the Benjamini-Hochberg FDR test for multiple comparisons are marked with an asterisk.

<sup>a</sup>Numbers may not add up to 100% of available subjects because of genotyping failure. All samples that did not give a reliable result in the first round of genotyping were resubmitted to up to two additional rounds of genotyping. Data points that were still not filled after this procedure had been left blank.



|                  |              |     |    |      |                |      |     |    |       |                       |                   |    |    |      |                |      |     |     |      |                       |      |     |    |      |                       |               |    |    |       |                |             |
|------------------|--------------|-----|----|------|----------------|------|-----|----|-------|-----------------------|-------------------|----|----|------|----------------|------|-----|-----|------|-----------------------|------|-----|----|------|-----------------------|---------------|----|----|-------|----------------|-------------|
|                  | <i>CT+TT</i> | 74  | 21 | 0.95 | 0.57-1.58      | 0.85 | 51  | 14 | 0.99  | 7.20<br>0.52-<br>1.86 | 0.97              | 22 | 7  | 0.95 | 0.40-2.24      | 0.91 | 74  | 33  | 1.02 | 3.99<br>0.68-<br>1.53 | 0.94 | 51  | 21 | 0.99 | 3.84<br>0.59-<br>1.65 | 0.96          | 22 | 12 | 1.13  | 0.58-2.21      | 0.73        |
|                  | <i>CC+CT</i> | 246 | 70 | Ref  |                |      | 158 | 43 | Ref   |                       |                   | 86 | 27 | Ref  |                |      | 246 | 107 | Ref  |                       |      | 158 | 67 | Ref  |                       |               | 86 | 40 | Ref   |                |             |
|                  | <i>TT</i>    | 6   | 2  | 1.55 | 0.38-6.30      | 0.54 | 5   | 1  | 0.98  | 0.14-<br>7.15         | 0.99              | 1  | 1  | 4.28 | 0.57-<br>32.30 | 0.16 | 6   | 2   | 0.96 | 0.24-<br>3.90         | 0.96 | 5   | 1  | 0.53 | 0.07-<br>3.80         | 0.53          | 1  | 1  | 10.86 | 1.34-<br>88.28 | <b>0.03</b> |
| <b>REV3L</b>     | <i>GG</i>    | 186 | 57 | Ref  |                |      | 120 | 35 | Ref   |                       |                   | 64 | 22 | Ref  |                |      | 186 | 88  | Ref  |                       |      | 120 | 55 | Ref  |                       |               | 64 | 33 | Ref   |                |             |
| <b>rs3204953</b> | <i>GA</i>    | 62  | 13 | 0.71 | 0.39-1.30      | 0.27 | 41  | 7  | 0.60  | 0.27-<br>1.36         | 0.22              | 21 | 6  | 0.87 | 0.35-2.14      | 0.76 | 62  | 19  | 0.62 | 0.38-<br>1.02         | 0.06 | 41  | 11 | 0.55 | 0.29-<br>1.05         | 0.07          | 21 | 8  | 0.73  | 0.34-1.59      | 0.43        |
|                  | <i>AA</i>    | 4   | 2  | 2.30 | 0.56-9.44      | 0.25 | 2   | 2  | 53.33 | 8.70-<br>327.02       | <b>&lt;.0001*</b> | 2  | 0  | NA   |                |      | 4   | 2   | 1.19 | 0.29-<br>4.81         | 0.81 | 2   | 2  | 6.24 | 1.45-<br>26.83        | <b>0.01*</b>  | 2  | 0  | NA    |                |             |
|                  | <i>GA+AA</i> | 66  | 15 | 0.78 | 0.44-1.39      | 0.40 | 43  | 9  | 0.77  | 0.37-<br>1.61         | 0.49              | 23 | 6  | 0.76 | 0.31-1.88      | 0.56 | 66  | 21  | 0.65 | 0.40-<br>1.04         | 0.07 | 43  | 13 | 0.64 | 0.35-<br>1.17         | 0.15          | 23 | 8  | 0.64  | 0.30-1.39      | 0.26        |
|                  | <i>GG+GA</i> | 248 | 70 | Ref  |                |      | 161 | 42 | Ref   |                       |                   | 85 | 28 | Ref  |                |      | 248 | 107 | Ref  |                       |      | 161 | 66 | Ref  |                       |               | 85 | 41 | Ref   |                |             |
|                  | <i>AA</i>    | 4   | 2  | 2.51 | 0.62-<br>10.25 | 0.20 | 2   | 2  | 70.36 | 11.47-<br>431.53      | <b>&lt;.0001*</b> | 2  | 0  | NA   |                |      | 4   | 2   | 1.32 | 0.33-<br>5.34         | 0.70 | 2   | 2  | 7.45 | 1.75-<br>31.81        | <b>0.007*</b> | 2  | 0  | NA    |                |             |

CRC, colorectal cancer; HR, hazard ratio; CI, confidence interval; NA, not applicable.

Significant results in bold. Results that passed the Benjamini-Hochberg FDR test for multiple comparisons are marked with an asterisk.

<sup>a</sup> Numbers may not add up to 100% of available subjects because of genotyping failure. All samples that did not give a reliable result in the first round of genotyping were resubmitted to up to two additional rounds of genotyping. Data points that were still not filled after this procedure had been left blank.

#### *Add 2.4. Survival and Therapy*

##### **Group 1 (Supplementary Table S2)**

**Czech sample set.** In the group of CRC patients receiving no treatment, carriers of the CG genotype in *MUS81* rs545500 were associated with increased EFS (CG vs. CC; HR 0.60; 95% CI 0.41-0.90; P = 0.01 and CG+GG vs. CC; HR 0.68; 95% CI 0.47-0.98; P = 0.04). The association remained significant by tumor sub-site. Although the decreased EFS (and OS as well) was observed in the recessive model for rectal cancer patients (GG vs. CC+CG OS: HR 2.38; 95% CI 1.43-3.96; P = 0.0009 and EFS: HR 2.06; 95% CI 1.36-3.11; P = 0.0007).

In rectal cancer patients, rs3218649 and rs1381057 in the *POLQ* gene were significantly associated with OS in the codominant and dominant models (rs3218649 GC+CC vs. GG; HR 2.09; 95% CI 1.20-3.64; P = 0.009; rs1381057 CT+TT vs. CC; HR 1.88; 95% CI 1.13-3.14; P = 0.02). Additionally, carriers of the variant GG genotype in *REV1* rs3087399 showed decreased EFS when compared with the most frequent AA genotype (HR 4.89; 95% CI 1.74-13.74; P = 0.003) or with A-allele carriers (HR 5.45; 95% CI 1.97-15.14; P = 0.001). However, in this case given the low numbers of patients with the variant genotype, the result should be considered with caution.

**Austrian sample set.** In colon cancer patients, carriers of the variant GG genotype in *POLE* rs5744934 were associated with decreased OS and EFS in both codominant and recessive models (GG vs. AA+AG OS: HR 5.40; 95% CI 1.31-22.29; P = 0.02 and EFS: HR 4.67; 95% CI 1.14-19.17; P = 0.03).

##### **Group 2 (Supplementary Table S3)**

**Czech sample set.** In patients undergoing 5-FU-based chemotherapy without oxaliplatin, there was no significant association with survival outcomes by genotype for all CRC patients. For colon cancer, only the homozygous variant genotype in *REV1* rs3087399 was marginally significantly associated with decreased OS (GG vs. AA; HR 4.10; 95% CI 1.00-16.91; P = 0.05). Two SNPs were associated with survival in rectal cancer patients. The TT variant genotype in *RAD51D* rs4796033 was associated with decreased OS in the codominant and recessive models (TT vs. CC; HR 3.98; 95% CI 1.40-11.33; P = 0.01; TT vs. CC+CT; HR 4.53; 95% CI 1.61-12.78; P = 0.004) while the variant CC genotype in *FAAP24* rs38116032 was associated with both OS and EFS in different genetic models (although with wide confidence intervals).

**Austrian sample set.** In colon cancer patients, the variant G-allele carriers in *POLN* rs9328764 were associated with increased EFS in codominant and dominant models (GG vs. AA; HR 0.08; 95% CI 0.01-0.64; P = 0.02 and AG+GG vs. AA; HR 0.06; 95% CI 0.01-0.52; P = 0.01).

##### **Group 3 (Supplementary Table S4)**

**Czech sample set.** Considering all CRC patients receiving 5-FU in combination with oxaliplatin, carriers of heterozygous genotypes in *FAAP24* rs3816032 and *POLQ* rs3218651 were associated with increased OS. In both cases the significance was reached in the codominant and dominant models, however, due to the low frequency of the homozygous variant genotypes in our patient group it was not possible to observe the same effect in the codominant model. Additionally, carriers of the variant GG genotype in *POLE* rs5744934 showed decreased EFS (GG vs. AA; HR 3.07; 95% CI 1.12-8.42; P = 0.03 and GG vs. AA+AG; HR 3.24; 95% CI 1.19-8.82; P = 0.02). The association of all three SNPs remained significant after stratification according to tumor localization. In colon cancer patients, two more SNPs were associated with decreased EFS (CC genotype in *FAAP24* rs3816032: CC vs. TT+TC; HR 4.01; 95% CI 0.98-16.31; P = 0.05 and TT genotype in *POLQ* rs1381057: TT vs. CC; HR 1.98; 95% CI 1.11-3.54; P = 0.02 and TT vs. CC+CT; HR 2.06; 95% CI 1.18-3.59; P = 0.01).

In rectal cancer patients two notable associations were detected: Carriers of the variant AA genotype in *REV3L* rs3204953 showed worse OS (AA vs. GG+GA; HR 35.51; 95% CI 3.22-391.55; P = 0.004) and

carriers of the variant allele G in *MUS81* rs545500 displayed decreased EFS (GG vs. CC; HR 4.21; 95% CI 1.20-14.75; P = 0.02 and CG+GG vs. CC; HR 3.73; 95% CI 1.15-12.14, P = 0.03).

**Austrian sample set.** In colon cancer patients, carriers of the variant AA genotype in *REV3L* rs3204953 were associated with decreased OS and EFS in codominant and recessive models (AA vs. GG+GA OS: HR 7.36; 95% CI 11.47-431.53; P < 0.0001 and EFS: HR 7.45; 95% CI 1.75-31.81; P = 0.007). In rectal cancer patients, rs4796033 in the *RAD51D* gene was significantly associated with EFS in the codominant and recessive models (TT vs. CC; HR 9.39; 95% CI 1.13-78.00; P = 0.04 and TT vs. CC+CT; HR 10.86; 95% CI 1.34-88.28; P = 0.03).
